# Supplementary material
Source: ML conference proceedings conference paper supplement (https://proceedings.mlr.press/v119/zhang20n.html)
Supplement: Supplementary file 1 [file zhang20n-supp.pdf]

## A. Notations

We begin the appendix with a restatement of the notations. Denote  $c, c', c_i$  as some universal positive constants. Notice that their values may not necessarily be the same even for those with same notations. We denote  $a \lesssim b$  if there exists some positive constant  $c_0 > 0$  such that  $a \leq c_0 b$ . Similarly we define  $a \gtrsim b$  provided  $a \geq c_0 b$  for some positive constant  $c_0$ . We write  $a \asymp b$  when  $a \lesssim b$  and  $a \gtrsim b$  hold simultaneously.

For an arbitrary matrix  $\mathbf{X}$ , we denote  $\mathbf{X}_{i,:}$  as the  $i$ -th row,  $\mathbf{X}_{:,i}$  as its  $i$ -th column, and  $X_{ij}$  as the  $(i, j)$ -th element. The Frobenius norm of  $\mathbf{X}$  is defined as  $\|\mathbf{X}\|_F$  while the operator norm is denoted as  $\|\mathbf{X}\|_{\text{OP}}$ , whose definition can be found in Section 2.3 of [Golub and Loan \(2013\)](#) (P71). Its stable rank  $\rho(\mathbf{X})$  is defined as the ratio  $\|\mathbf{X}\|_F^2 / \|\mathbf{X}\|_{\text{OP}}^2$  (Section 2.1.15 in [Tropp \(2015\)](#)). The inner product  $\langle \mathbf{A}, \mathbf{C} \rangle$  is defined as  $\sum_{ij} A_{ij} C_{ij}$ .

Associate with each permutation matrix  $\mathbf{\Pi}$ , we define the operator  $\pi(\cdot)$  that transforms index  $i$  to  $\pi(i)$ . The Hamming distance  $d_{\text{H}}(\mathbf{\Pi}_1, \mathbf{\Pi}_2)$  between permutation matrix  $\mathbf{\Pi}_1$  and  $\mathbf{\Pi}_2$  is defined as  $d_{\text{H}}(\mathbf{\Pi}_1, \mathbf{\Pi}_2) = \sum_{i=1}^n \mathbb{1}(\pi_1(i) \neq \pi_2(i))$ . Additionally, we denote  $\bar{\mathcal{E}}$  as the complement of the event  $\mathcal{E}$  and the *signal-to-noise-ratio* (SNR) as  $\text{SNR} = \|\mathbf{B}^\natural\|_F^2 / (m\sigma^2)$ .

## B. Problem Restatement

To begin with, we recall the problem formulation, which reads as

$$\mathbf{Y} = \mathbf{\Pi}^\natural \mathbf{X} \mathbf{B}^\natural + \mathbf{W},$$

where  $\mathbf{Y} \in \mathbb{R}^{n \times m}$  represents the observation,  $\mathbf{\Pi} \in \mathbb{R}^{n \times n}$  denotes the unknown permutation matrix,  $\mathbf{X} \in \mathbb{R}^{n \times p}$  is the sensing matrix (design matrix) with  $X_{ij} \stackrel{\text{i.i.d.}}{\sim} \mathcal{N}(0, 1)$  being a standard normal random variable (RV),  $\mathbf{B}^\natural \in \mathbb{R}^{p \times m}$  is the matrix of regression coefficients, and  $\mathbf{W} \in \mathbb{R}^{n \times m}$  is the additive Gaussian noise matrix such that  $W_{ij} \stackrel{\text{i.i.d.}}{\sim} \mathcal{N}(0, \sigma^2)$ .

Our goal is to reconstruct the pair  $(\hat{\mathbf{\Pi}}, \hat{\mathbf{B}})$  from the observation  $\mathbf{Y}$  and sensing matrix (design matrix)  $\mathbf{X}$ . The proposed one-step estimator can be written as

$$\begin{aligned} \hat{\mathbf{\Pi}} &= \operatorname{argmax}_{\mathbf{\Pi} \in \mathcal{P}_n} \langle \mathbf{\Pi}, \mathbf{Y} \mathbf{Y}^\top \mathbf{X} \mathbf{X}^\top \rangle, \\ \hat{\mathbf{B}} &= (\mathbf{X})^\dagger \hat{\mathbf{\Pi}}^\top \mathbf{Y}, \end{aligned}$$

where  $\mathbf{X}^\dagger = (\mathbf{X}^\top \mathbf{X})^{-1} \mathbf{X}^\top$  denotes the pseudo-inverse of  $\mathbf{X}$ . In the following, we will separately investigate its properties under the single observation model ( $m = 1$ ) and multiple observations model ( $m > 1$ ). The formal statement is packaged in Theorem 1 and Theorem 2.

## C. Appendix for Section 3

This section focuses on the special case where  $p = 1, m = 1$ . Consider  $\mathbf{X} \in \mathbb{R}^n$  to be a Gaussian distributed RV such that  $\mathbf{X} \sim \mathcal{N}(\mathbf{0}, \mathbf{I}_{n \times n})$ , and permutation matrix  $\mathbf{\Pi}^\natural$  which satisfies  $d_{\text{H}}(\mathbf{I}, \mathbf{\Pi}^\natural) = h \leq n/4$ .

### C.1. Notations

First we define the following events  $\mathcal{E}_i, (1 \leq i \leq 5)$ , which reads

$$\begin{aligned} \mathcal{E}_1 &\triangleq \left\{ \langle \mathbf{X}, \mathbf{\Pi}^\natural \mathbf{X} \rangle \geq c_0 n \right\}, \\ \mathcal{E}_2 &\triangleq \left\{ \|\mathbf{X}\|_2 \leq 2\sqrt{n} \right\} \\ \mathcal{E}_3(\mathbf{\Pi}) &\triangleq \left\{ \mathbf{W}^\top \mathbf{X} \mathbf{X}^\top (\mathbf{\Pi}^\natural - \mathbf{\Pi}) \mathbf{W} \lesssim \sigma^2 n^2 \log n \right\}, \\ \mathcal{E}_4(\mathbf{\Pi}) &\triangleq \left\{ \left| \langle \mathbf{W}, \mathbf{X} \rangle \langle \mathbf{\Pi}^\natural \mathbf{X}, (\mathbf{\Pi}^\natural - \mathbf{\Pi})^\top \mathbf{X} \rangle + \langle \mathbf{W}, (\mathbf{\Pi}^\natural - \mathbf{\Pi})^\top \mathbf{X} \rangle \langle \mathbf{\Pi}^\natural \mathbf{X}, \mathbf{X} \rangle \right| \lesssim \sigma n^2 \sqrt{\log n} \right\} \\ \mathcal{E}_5(\mathbf{\Pi}; \ell) &\triangleq \left\{ \|\mathbf{X} - \mathbf{\Pi} \mathbf{X}\|_2^2 \geq \frac{12\ell}{5en^{20}}, \quad d_{\text{H}}(\mathbf{I}, \mathbf{\Pi}) = \ell \right\}, \end{aligned}$$

where  $\mathbf{\Pi}$  is an arbitrary permutation matrix, and  $c_0 > 0$  is some positive constant.

## C.2. Outline of proof

We will prove that ground truth permutation matrix  $\mathbf{\Pi}^{\natural}$  will be returned with high probability under the assumptions in Theorem 1. The formal statement is shown in Theorem 1. Before we delve into the proof details, we give a roadmap of the proof, which is

- **Step I:** Under the events  $\mathcal{E}_1 \cap_{\mathbf{\Pi}} (\mathcal{E}_3(\mathbf{\Pi}) \cap \mathcal{E}_4(\mathbf{\Pi}) \cap \mathcal{E}_5(\mathbf{\Pi}; \ell))$ , we have

$$\left\langle \mathbf{\Pi}^{\natural}, \mathbf{y}\mathbf{y}^{\top} \mathbf{X}\mathbf{X}^{\top} \right\rangle - \left\langle \mathbf{\Pi}, \mathbf{y}\mathbf{y}^{\top} \mathbf{X}\mathbf{X}^{\top} \right\rangle \gtrsim \frac{c_0\beta^2}{n^{19}} - c_1\beta\sigma n^2 \sqrt{\log n} - c_2\sigma^2 n^2 \log n.$$

Notice that under assumptions in Theorem 1, we conclude that  $\left\langle \mathbf{\Pi}^{\natural}, \mathbf{y}\mathbf{y}^{\top} \mathbf{X}\mathbf{X}^{\top} \right\rangle > \left\langle \mathbf{\Pi}, \mathbf{y}\mathbf{y}^{\top} \mathbf{X}\mathbf{X}^{\top} \right\rangle, \forall \mathbf{\Pi}$ , which suggests that  $\mathbf{\Pi}^{\natural}$  will always be returned by our estimator in Eq. (3).

- **Step II:** We upper-bound the probability  $\mathbb{P}(\hat{\mathbf{\Pi}} \neq \mathbf{\Pi}^{\natural})$  by  $\mathbb{P}(\bar{\mathcal{E}}_1 \cup_{\mathbf{\Pi}} (\bar{\mathcal{E}}_3(\mathbf{\Pi}) \cup \bar{\mathcal{E}}_4(\mathbf{\Pi}) \cup \bar{\mathcal{E}}_5(\mathbf{\Pi}; \ell)))$  and complete the proof by showing it is at most  $cn^{-1}$ .

Having illustrated the proof strategy, we turn to the proof details. The main proof is attached in Section C.3 while the supporting lemmas bounding  $\mathbb{P}(\mathcal{E}_i)$ , ( $1 \leq i \leq 5$ ), are put in Section C.4.

## C.3. Proof of Theorem 1

**Proof 1** For an arbitrary permutation matrix  $\mathbf{\Pi}$ , we can expand the term  $\left\langle \mathbf{\Pi}, \mathbf{y}\mathbf{y}^{\top} \mathbf{X}\mathbf{X}^{\top} \right\rangle$  as

$$\left\langle \mathbf{\Pi}, \mathbf{y}\mathbf{y}^{\top} \mathbf{X}\mathbf{X}^{\top} \right\rangle = \mathcal{T}_1(\mathbf{\Pi}) + \beta\mathcal{T}_2(\mathbf{\Pi}) + \beta^2\mathcal{T}_3(\mathbf{\Pi}),$$

where  $\mathcal{T}_i(\mathbf{\Pi})$ , ( $1 \leq i \leq 3$ ), are defined as

$$\begin{aligned} \mathcal{T}_1(\mathbf{\Pi}) &= \left\langle \mathbf{W}, \mathbf{\Pi}^{\top} \mathbf{X} \right\rangle \left\langle \mathbf{X}, \mathbf{W} \right\rangle; \\ \mathcal{T}_2(\mathbf{\Pi}) &= \left\langle \mathbf{W}, \mathbf{X} \right\rangle \left\langle \mathbf{\Pi}^{\natural} \mathbf{X}, \mathbf{\Pi}^{\top} \mathbf{X} \right\rangle + \left\langle \mathbf{W}, \mathbf{\Pi}^{\top} \mathbf{X} \right\rangle \left\langle \mathbf{\Pi}^{\natural} \mathbf{X}, \mathbf{X} \right\rangle; \\ \mathcal{T}_3(\mathbf{\Pi}) &= \left\langle \mathbf{\Pi}^{\natural} \mathbf{X}, \mathbf{\Pi} \mathbf{X} \right\rangle \left\langle \mathbf{\Pi}^{\natural} \mathbf{X}, \mathbf{X} \right\rangle. \end{aligned}$$

**Step I:** We rewrite the difference  $\left\langle \mathbf{\Pi}^{\natural}, \mathbf{y}\mathbf{y}^{\top} \mathbf{X}\mathbf{X}^{\top} \right\rangle - \left\langle \mathbf{\Pi}, \mathbf{y}\mathbf{y}^{\top} \mathbf{X}\mathbf{X}^{\top} \right\rangle$  as

$$\begin{aligned} & \left\langle \mathbf{\Pi}^{\natural}, \mathbf{y}\mathbf{y}^{\top} \mathbf{X}\mathbf{X}^{\top} \right\rangle - \left\langle \mathbf{\Pi}, \mathbf{y}\mathbf{y}^{\top} \mathbf{X}\mathbf{X}^{\top} \right\rangle \\ &= \mathcal{T}_1(\mathbf{\Pi}^{\natural}) - \mathcal{T}_1(\mathbf{\Pi}) + \beta \left( \mathcal{T}_2(\mathbf{\Pi}^{\natural}) - \mathcal{T}_2(\mathbf{\Pi}) \right) + \beta^2 \left( \mathcal{T}_3(\mathbf{\Pi}^{\natural}) - \mathcal{T}_3(\mathbf{\Pi}) \right) \\ &\stackrel{\textcircled{1}}{=} \frac{\beta^2}{2} \left\langle \mathbf{\Pi}^{\natural} \mathbf{X}, \mathbf{X} \right\rangle \left\| \mathbf{X} - \mathbf{\Pi}^{\natural\top} \mathbf{\Pi} \mathbf{X} \right\|_2^2 + \beta \left( \mathcal{T}_2(\mathbf{\Pi}^{\natural}) - \mathcal{T}_2(\mathbf{\Pi}) \right) + \mathcal{T}_1(\mathbf{\Pi}^{\natural}) - \mathcal{T}_1(\mathbf{\Pi}) \\ &\stackrel{\textcircled{2}}{\geq} \frac{\beta^2}{2} c_0 n \frac{24}{5en^{20}} - \beta \left| \mathcal{T}_2(\mathbf{\Pi}^{\natural}) - \mathcal{T}_2(\mathbf{\Pi}) \right| - \left| \mathcal{T}_1(\mathbf{\Pi}^{\natural}) - \mathcal{T}_1(\mathbf{\Pi}) \right| \\ &\stackrel{\textcircled{3}}{\gtrsim} \frac{c_0\beta^2}{n^{19}} - c_1\beta\sigma n^2 \sqrt{\log n} - c_2\sigma^2 n^2 \log n \stackrel{\textcircled{4}}{>} 0, \end{aligned}$$

where in  $\textcircled{1}$  we rewrite  $\left\| \mathbf{X} \right\|_2^2 - \left\langle \mathbf{\Pi}^{\natural} \mathbf{X}, \mathbf{\Pi} \mathbf{X} \right\rangle$  as

$$\left\| \mathbf{X} \right\|_2^2 - \left\langle \mathbf{\Pi}^{\natural} \mathbf{X}, \mathbf{\Pi} \mathbf{X} \right\rangle = \frac{1}{2} \left( \left\| \mathbf{X} \right\|_2^2 + \left\| \mathbf{\Pi}^{\natural\top} \mathbf{\Pi} \mathbf{X} \right\|_2^2 - 2 \left\langle \mathbf{\Pi}^{\natural} \mathbf{X}, \mathbf{\Pi} \mathbf{X} \right\rangle \right) = \frac{1}{2} \left\| \mathbf{X} - \mathbf{\Pi}^{\natural\top} \mathbf{\Pi} \mathbf{X} \right\|_2^2,$$

in  $\textcircled{2}$  we condition on event  $\mathcal{E}_1, \mathcal{E}_5(\mathbf{\Pi}; \ell)$  and have  $\left\| \mathbf{X} - \mathbf{\Pi} \mathbf{X} \right\|_2^2 \geq \frac{12\ell}{5en^{20}} \geq \frac{24}{5en^{20}}$ , in  $\textcircled{3}$  we condition on  $\mathcal{E}_3(\mathbf{\Pi}), \mathcal{E}_4(\mathbf{\Pi})$ , and in  $\textcircled{4}$  we use the assumption  $\log(\text{SNR}) \gtrsim \log n$  in Theorem 1.

**Step II:** The error probability  $\mathbb{P}(\widehat{\Pi} \neq \Pi^{\natural})$  is hence be upper-bounded as

$$\begin{aligned}
 \mathbb{P}(\widehat{\Pi} \neq \Pi^{\natural}) &\leq \mathbb{P}\left(\overline{\mathcal{E}}_1 \cup \left(\overline{\mathcal{E}}_3(\Pi) \cup \overline{\mathcal{E}}_4(\Pi) \cup \overline{\mathcal{E}}_5(\Pi; \ell)\right)\right) \\
 &\stackrel{\textcircled{5}}{\leq} \mathbb{P}\left(\bigcup_{\Pi} \left(\overline{\mathcal{E}}_3(\Pi) \cup \overline{\mathcal{E}}_4(\Pi) \cup \overline{\mathcal{E}}_5(\Pi)\right) \cap \mathcal{E}_1 \cap \mathcal{E}_2\right) + \mathbb{P}(\overline{\mathcal{E}}_1) + \mathbb{P}(\overline{\mathcal{E}}_2) \\
 &\stackrel{\textcircled{6}}{\leq} \sum_{\Pi^{\natural} \neq \Pi} \mathbb{P}\left(\overline{\mathcal{E}}_3(\Pi) \cap \mathcal{E}_1 \cap \mathcal{E}_2\right) + \sum_{\Pi^{\natural} \neq \Pi} \mathbb{P}\left(\overline{\mathcal{E}}_4(\Pi) \cap \mathcal{E}_1 \cap \mathcal{E}_2\right) \\
 &\quad + \sum_{\ell \geq 2} \mathbb{P}\left(\overline{\mathcal{E}}_5(\Pi; \ell) \cap \mathcal{E}_1 \cap \mathcal{E}_2\right) + 8n^{-1} + 2e^{-c_0 n} \\
 &\stackrel{\textcircled{7}}{\leq} 2n^{-n} + 3 \sum_{\ell \geq 2} \binom{n}{\ell} \ell! n^{-2\ell} + 8n^{-1} + 2e^{-c_0 n} \\
 &\stackrel{\textcircled{8}}{\lesssim} c_0 n^{-n} + n^{-1} + 3 \sum_{\ell \geq 2} n^{\ell} n^{-2\ell} \lesssim c_0 n^{-1} + \frac{3}{n(n-1)} \lesssim n^{-1},
 \end{aligned}$$

where in  $\textcircled{5}$  we use the union bound, in  $\textcircled{6}$  we complete the proof with Lemma 1 and the fact  $\mathbb{P}(\overline{\mathcal{E}}_2) \leq e^{-0.8n}$ , in  $\textcircled{7}$  we invoke Lemma 2, Lemma 3, Lemma 4, and in  $\textcircled{8}$  we use  $n!/(n-\ell)! \leq n^{\ell}$  and complete the proof.

#### C.4. Supporting Lemmas for Theorem 1

This subsection collects the supporting lemmas for the proof of Theorem 1.

**Lemma 1** We have  $\mathbb{P}(\overline{\mathcal{E}}_1) \leq 8n^{-1} + e^{-0.238n}$  when  $n$  is sufficiently large.

**Proof 2** Different from the proof in Lemma 9, we consider the case where  $\mathbf{X} \in \mathbb{R}^n$  is a vector and would lower-bound  $\langle \mathbf{X}, \Pi^{\natural} \mathbf{X} \rangle$ . W.l.o.g, we assume the first  $h$  entries are permuted and expand the inner product  $\langle \mathbf{X}, \Pi^{\natural} \mathbf{X} \rangle$  as

$$\langle \mathbf{X}, \Pi^{\natural} \mathbf{X} \rangle = \sum_{i=1}^h X_i X_{\pi(i)} + \sum_{i=h+1}^n X_i^2.$$

With union bound, we can upper bound  $\mathbb{P}\left(\langle \mathbf{X}, \Pi^{\natural} \mathbf{X} \rangle \leq c_0 n\right)$  as

$$\mathbb{P}\left(\langle \mathbf{X}, \Pi^{\natural} \mathbf{X} \rangle \leq c_0 n\right) \stackrel{\textcircled{1}}{\leq} \underbrace{\mathbb{P}\left(\sum_{i=h+1}^n X_i^2 \leq \frac{1}{4}(n-h)\right)}_{\zeta_1} + \underbrace{\mathbb{P}\left(\sum_{i=1}^h X_i X_{\pi(i)} \leq -\frac{4\sqrt{2} + \sqrt{35}}{\sqrt{2}} \sqrt{n \log n}\right)}_{\zeta_2},$$

where  $c_0 > 0$  is some positive constant, in  $\textcircled{1}$  we use the fact

$$\frac{n-h}{4} - \frac{4\sqrt{2} + \sqrt{35}}{\sqrt{2}} \sqrt{n \log n} \stackrel{(h \leq \frac{n}{4})}{\geq} \frac{3n}{16} - \frac{4\sqrt{2} + \sqrt{35}}{\sqrt{2}} \sqrt{n \log n} \geq c_0 n,$$

when  $n$  is large. We finish the proof by separately upper-bounding  $\zeta_1 \leq e^{-0.2386n}$  and  $\zeta_2 \leq 8n^{-1}$ . The detailed computation comes as follows.

**Phase I:** For  $\zeta_1$ , we can view  $\sum_{i=h+1}^n X_i^2$  as a  $\chi^2$ -RV with  $(n-h)$  freedom and have

$$\zeta_1 \stackrel{\textcircled{2}}{\leq} \exp\left(\frac{n-h}{2} \left(\log \frac{1}{4} - \frac{1}{4} + 1\right)\right) \stackrel{\textcircled{3}}{\leq} e^{-0.2386n},$$

where in ② we use Lemma 11, and ③ is because  $h \leq n/4$ .

**Phase II:** To bound  $\zeta_2$ , we divide the index set  $\{j : j \neq \pi(j)\}$  into 3 disjoint sets  $\mathcal{I}_i$ ,  $1 \leq i \leq 3$ , as in Lemma 8 in Pananjady et al. (2017a) (restated as Lemma 13). This division has two properties: (i) indices  $j$  and  $\pi(j)$  lies in different sets; (ii) the cardinality  $h_i$  of each  $\mathcal{I}_i$  satisfies  $\lfloor h/5 \rfloor \leq h_i \leq h/3$ . Then we obtain

$$\begin{aligned} \zeta_2 &\leq \mathbb{P} \left( \sum_{i=1}^h X_i X_{\pi(i)} \leq -\frac{4\sqrt{2} + \sqrt{35}}{\sqrt{2}} \sqrt{n \log n}, |X_i| \leq 2\sqrt{\log n}, \forall i \right) + \mathbb{P} \left( |X_i| \geq 2\sqrt{\log n}, \exists i \right) \\ &\stackrel{\textcircled{4}}{\leq} \sum_{i=1}^3 \underbrace{\mathbb{P} \left( \sum_{j \in \mathcal{I}_i} X_j X_{\pi(j)} \leq -\frac{4\sqrt{2} + \sqrt{35}}{3\sqrt{2}} \sqrt{n \log n}, |X_i| \leq 2\sqrt{\log n}, \forall i \right)}_{\zeta_{2,i}} + \underbrace{n \mathbb{P} \left( |X_i| \geq 2\sqrt{\log n} \right)}_{\leq 2n^{-2}}, \end{aligned}$$

where in ④ we use the union bound for  $\sum_{i=1}^h X_i X_{\pi(i)}$  and the tail bounds for Gaussian distributed  $X_i$ .

Then we define  $Z_i = \sum_{j \in \mathcal{I}_i} X_j X_{\pi(j)}$  and bound  $\zeta_{2,i}$  via the Bernstein inequality (Theorem 2.8.4 in Vershynin (2018)). First, we verify that  $\mathbb{E}(X_j X_{\pi(j)}) = (\mathbb{E}X_j)(\mathbb{E}X_{\pi(j)}) = 0$ . Meanwhile we compute  $\sigma^2 = \sum_{j \in \mathcal{I}_i} \mathbb{E}(X_j X_{\pi(j)})^2 = h_i$ . According to the Bernstein inequality, we have

$$\left| \sum_{j \in \mathcal{I}_i} X_j X_{\pi(j)} \right| \geq \frac{4}{3} (\log n)^2 + \sqrt{\frac{16}{9} (\log n)^4 + 2(\log n)h_i},$$

holds with probability  $2n^{-1}$ . Meanwhile, we can upper bound as

$$\frac{4}{3} (\log n)^2 + \sqrt{\frac{16}{9} (\log n)^4 + 2(\log n)h_i} \leq \frac{4}{3} (\log n)^2 + \sqrt{\frac{16}{9} (\log n)^4 + \frac{n \log n}{6}} \stackrel{\textcircled{5}}{\leq} \frac{4\sqrt{2} + \sqrt{35}}{3\sqrt{2}} \sqrt{n \log n},$$

where ⑤ is because  $n \geq \log^3(n)$  for  $n \geq 95$ . Hence, we conclude that  $\zeta_{2,i} \leq 2n^{-1}$  and complete the proof by combining the bound for  $\zeta_1$  and  $\zeta_2$ .

**Lemma 2** We have  $\mathbb{P}(\bar{\mathcal{E}}_3(\mathbf{\Pi}) \cap \mathcal{E}_2) \leq n^{-2n}$ .

**Proof 3** For the conciseness of notation, we define  $\mathbf{\Xi}$  as  $\mathbf{\Xi} \triangleq \mathbf{X}\mathbf{X}^\top (\mathbf{\Pi}^\natural - \mathbf{\Pi})$ . Due to the independence of the  $\mathbf{X}$  and  $\mathbf{W}$ , we can condition on  $\mathbf{X}$  and bound  $\mathbb{P}(\bar{\mathcal{E}}_3(\mathbf{\Pi}) \cap \mathcal{E}_2)$  as

$$\begin{aligned} &\mathbb{P}(\bar{\mathcal{E}}_3(\mathbf{\Pi}) \cap \mathcal{E}_2) \stackrel{\textcircled{1}}{\leq} \mathbb{P}(\mathbf{W}^\top \mathbf{\Xi} \mathbf{W} \geq \mathbb{E} \mathbf{W}^\top \mathbf{\Xi} \mathbf{W} + c\sigma^2 n^2 \log n) \\ &\stackrel{\textcircled{2}}{\leq} \exp \left( - \left( \frac{c_0 n^4 \log^2 n}{\|\mathbf{\Xi}\|_F^2} \wedge \frac{c_1 n^2 \log n}{\|\mathbf{\Xi}\|_2} \right) \right) \stackrel{\textcircled{3}}{\leq} n^{-2n}, \end{aligned}$$

where in ① we condition on  $\mathcal{E}_2$  and use the fact

$$\mathbb{E} \mathbf{W}^\top \mathbf{\Xi} \mathbf{W} + c\sigma^2 n^2 \log n \lesssim \sigma^2 \|\mathbf{X}\|_2^2 + c\sigma^2 n^2 \log n \lesssim \sigma^2 n^2 \log n,$$

in ② we use Hanson-Wright inequality (Theorem 6.2.1 in Vershynin (2018)), and in ③ we condition on  $\mathcal{E}_2$  and use  $\|\mathbf{\Xi}\|_2 \lesssim \|\mathbf{X}\|_2^2 \lesssim n$ .

**Lemma 3** We have  $\mathbb{P}(\bar{\mathcal{E}}_4(\mathbf{\Pi}) \cap \mathcal{E}_2) \leq n^{-2n}$ .

**Proof 4** Due to the independence between  $\mathbf{W}$  and  $\mathbf{X}$ , we would like to condition on  $\mathbf{X}$  and bound  $\mathbb{P}(\bar{\mathcal{E}}_4(\mathbf{\Pi}) \cap \mathcal{E}_2)$  as

$$\mathbb{P}(\bar{\mathcal{E}}_4(\mathbf{\Pi}) \cap \mathcal{E}_2) \leq \exp \left( -\frac{4c\sigma^2 n^4 \log n}{2\sigma_{\mathbf{\Pi}}^2} \right),$$

where  $\sigma_{\Pi}^2$  is defined as

$$\sigma_{\Pi}^2 = \sigma^2 \left\| \left\langle \Pi^{\natural} \mathbf{X}, (\Pi^{\natural} - \Pi)^{\top} \mathbf{X} \right\rangle \mathbf{X} + \left\langle \Pi^{\natural} \mathbf{X}, \mathbf{X} \right\rangle (\Pi^{\natural} - \Pi) \mathbf{X} \right\|_{\text{F}}^2,$$

Notice under  $\mathcal{E}_2$ , we have  $\sigma_{\Pi}^2 \lesssim \sigma^2 \left(4\|\mathbf{X}\|_2^3\right)^2 = c\sigma^2 n^3$ , and complete the proof by showing

$$\exp\left(-\frac{4c\sigma^2 n^4 \log n}{2\sigma_{\Pi}^2}\right) \leq \exp\left(-\frac{4c\sigma^2 n^4 \log n}{2c\sigma^2 n^3}\right) = n^{-2n}.$$

**Lemma 4** We have  $\mathbb{P}(\bar{\mathcal{E}}_5(\Pi); \ell) \leq 3n^{-2\ell}$ .

**Proof 5** Adopting a similar approach as in proving Lemma 1, we can decompose the index sets  $\{j : j \neq \pi(j)\}$  into 3 disjoint sets  $\mathcal{I}_i$  ( $1 \leq i \leq 3$ ) such that: (1)  $j$  and  $\pi(j)$  do not lie within the same index set  $\mathcal{I}_i$ ; and (2) the cardinality  $\ell_i$  of  $\mathcal{I}_i$  satisfies  $\lfloor \ell/5 \rfloor \leq \ell_i \leq \ell/3$ . Then we can bound  $\mathbb{P}(\mathcal{E}_5(\Pi; \ell))$  as

$$\begin{aligned} & \mathbb{P}\left(\|\mathbf{X} - \Pi^{\natural} \mathbf{X}\|_2^2 \leq \frac{12\ell}{5en^{20}}\right) \stackrel{\textcircled{1}}{=} \sum_{i=1}^3 \mathbb{P}\left(\sum_{j \in \mathcal{I}_i} (X_j - X_{\pi(j)})^2 \leq \frac{4\ell}{5en^{20}}\right) \\ & \stackrel{\textcircled{2}}{\leq} \sum_{i=1}^3 \exp\left(\frac{\ell_i}{2} \left(\log \frac{2\ell}{5en^{20}\ell_i} - \frac{2\ell}{5en^{20}\ell_i} + 1\right)\right) \stackrel{\textcircled{3}}{\leq} 3n^{-2\ell}. \end{aligned}$$

where  $\textcircled{1}$  is due to the decomposition  $\mathcal{I}_i$ ,  $1 \leq i \leq 3$ ,  $\textcircled{2}$  is because  $\sum (X_j - X_{\pi(j)})^2 / 2$  is a  $\chi^2$  RV with freedom  $\ell_i$  and Lemma 11, and  $\textcircled{3}$  is due to  $\lfloor \ell/5 \rfloor \leq \ell_i \leq \ell/3$  and hence

$$\frac{\ell_i}{2} \left(\log \frac{2\ell}{5en^{20}\ell_i} - \frac{2\ell}{5en^{20}\ell_i} + 1\right) \leq \frac{\ell_i}{2} \left(\log \frac{2\ell}{5\ell_i} - 20 \log n\right) \leq -10\ell_i \log n \leq -2\ell \log n.$$

## D. Appendix for Section 4

This section provides theoretical analysis for the multiple observations model, i.e.,  $m > 1$ . We will show that our estimator in Eq. (3) gives correct permutation matrix  $\Pi^{\natural}$  once

$$\log(\text{SNR}) \gtrsim \frac{\log n}{\rho(\mathbf{B}^{\natural})} + \log \log n.$$

The formal statement is packaged in Theorem 2.

### D.1. Notations

Before our discussion, first we define  $\tilde{\mathbf{B}}$  and  $\mathbf{B}^*$  respectively as

$$\begin{aligned} \tilde{\mathbf{B}} &= (n-h)^{-1} \mathbf{X}^{\top} \Pi^{\natural} \mathbf{X} \mathbf{B}^{\natural}, \\ \mathbf{B}^* &= (n-h)^{-1} \mathbf{X}^{\top} \mathbf{Y} = \tilde{\mathbf{B}} + (n-h)^{-1} \mathbf{X}^{\top} \mathbf{W}, \end{aligned}$$

where  $h$  is denoted as the Hamming distance between identity matrix  $\mathbf{I}$  and the ground truth permutation matrix  $\Pi^{\natural}$ , i.e.,  $h = d_{\text{H}}(\mathbf{I}, \Pi^{\natural})$ . Similar as in Section C, we define events  $\mathcal{E}_i$ , ( $6 \leq i \leq 9$ ) as

$$\mathcal{E}_6 \triangleq \left\{ \|\mathbf{X}_{i,:}\|_2 \leq 2\sqrt{p \log n}, \forall i \right\};$$

$$\mathcal{E}_7 \triangleq \left\{ \|\mathbf{X}_{i,:} (\mathbf{B}^* - \mathbf{B}^{\natural})\|_2 \lesssim c_0 \frac{p(\log n)^{3/2}(\log p)}{\sqrt{n}} \|\mathbf{B}^{\natural}\|_{\text{F}} + c_1 \sqrt{m}(\log n)\sigma \left(1 + \frac{p}{n}\right), \forall i \right\};$$

$$\mathcal{E}_8 \triangleq \left\{ \langle \mathbf{W}_{i,:}, (\mathbf{X}_{j,:} - \mathbf{X}_{\pi^{\natural}(i),:}) \mathbf{B}^* \rangle \geq \Delta, \exists i, j \right\};$$

$$\mathcal{E}_9 \triangleq \left\{ \left\| (\mathbf{X}_{\pi^{\natural}(i),:} - \mathbf{X}_{j,:}) \mathbf{B}^{\natural} \right\|_2^2 + 2 \langle (\mathbf{X}_{\pi^{\natural}(i),:} - \mathbf{X}_{j,:}) \mathbf{B}^{\natural}, \mathbf{X}_{j,:} (\mathbf{B}^{\natural} - \mathbf{B}^*) \rangle - \|\mathbf{X}_{\pi^{\natural}(i),:} (\mathbf{B}^{\natural} - \mathbf{B}^*)\|_2^2 \leq \Delta, \exists i, j \right\},$$

where  $\Delta$  is defined as

$$\Delta = 16\sqrt{2}c_0\sigma \frac{p(\log n)^{3/2}(\log p)}{\sqrt{n}} \|\mathbf{B}^{\natural}\|_{\text{F}} + 16c_1\sqrt{2m}(\log n)\sigma^2 \left(1 + \frac{p}{n}\right) + 4\sqrt{2}c_2(\log n)\sigma \|\mathbf{B}^{\natural}\|_{\text{F}}.$$

## D.2. Outline of proof

In front of the rigorous proof in Section D.3, we first illustrate our proof strategy as

- **Step I:** We relax the wrong recovery  $\{\widehat{\Pi} \neq \Pi^{\natural}\}$  to event  $\mathcal{E}$ , i.e.  $\{\widehat{\Pi} \neq \Pi^{\natural}\} \subseteq \mathcal{E}$ , which reads as

$$\mathcal{E} \triangleq \left\{ \|\mathbf{Y}_{i,:} - \mathbf{X}_{\pi^{\natural}(i),:} \mathbf{B}^*\|_2^2 \geq \|\mathbf{Y}_{i,:} - \mathbf{X}_{j,:} \mathbf{B}^*\|_2^2, \exists i, j \right\}. \quad (14)$$

The physical meaning of  $\mathcal{E}$  is that we may reduce the residual  $\|\mathbf{Y} - \Pi^{\natural} \mathbf{X} \mathbf{B}^*\|_{\text{F}}$  by changing  $\pi^{\natural}(i)$  to  $j$ . Same relaxation has been previously used in Collier and Dalalyan (2016); Slawski et al. (2019a); Zhang et al. (2019a;b).

- **Step II:** The core in this step lies in how to lower bound  $\mathbb{P}(\mathcal{E}_7)$ . First we decompose  $\mathcal{E}$  into  $\mathcal{E}_8 \cup \mathcal{E}_9$  with some simple algebraic manipulations. Under the SNR assumption in Eq. (7), we show both  $\mathbb{P}(\mathcal{E}_8)$  and  $\mathbb{P}(\mathcal{E}_9)$  are approximately  $\mathbb{P}(\overline{\mathcal{E}}_7)$ , as in Lemma 5 and Lemma 6, respectively.

To show  $\mathbb{P}(\overline{\mathcal{E}}_7)$  is with low probability, in another words,  $\mathbb{P}(\mathcal{E}_7)$  is highly likely, we prove the following relations hold with high probability under  $\mathcal{E}_6$ ,

$$\begin{aligned} \|\mathbf{X}_{i,:} (\tilde{\mathbf{B}} - \mathbf{B}^{\natural})\|_2 &\lesssim \frac{p(\log n)^{3/2}(\log p)}{\sqrt{n}} \|\mathbf{B}^{\natural}\|_{\text{F}}; \\ \|\mathbf{X}_{i,:} \mathbf{X}^{\top} \mathbf{W}\|_2 &\lesssim \sqrt{m}(\log n)\sigma(n+p), \end{aligned}$$

whose proof are in Lemma 9 and Lemma 10, respectively, and hence finish the proof by

$$\|\mathbf{X}_{i,:} (\mathbf{B}^* - \mathbf{B}^{\natural})\|_2 \leq \|\mathbf{X}_{i,:} (\tilde{\mathbf{B}} - \mathbf{B}^{\natural})\|_2 + \frac{1}{n-h} \|\mathbf{X}_{i,:} \mathbf{X}^{\top} \mathbf{W}\|_2.$$

In particular, we would like to mention the technique used in bounding  $\|\mathbf{X}_{i,:} \mathbf{X}^{\top} \mathbf{W}\|_2$ . First we review the widely-used bounding procedure, which proceeds as

$$\|\mathbf{X}_{i,:} \mathbf{X}^{\top} \mathbf{W}\|_2 \leq \|\mathbf{X}_{i,:}\|_2 \|\mathbf{X}\|_2 \|\mathbf{W}\|_2 \stackrel{\textcircled{1}}{\lesssim} \sqrt{p \log n} (\sqrt{n} + \sqrt{p}) \sigma(\sqrt{n} + \sqrt{m}) \stackrel{\textcircled{2}}{\asymp} \sqrt{\log n} (n^{3/2}) \sigma + \sqrt{mn \log n} \sigma,$$

where in  $\textcircled{1}$  we use the fact  $\|\mathbf{X}_{i,:}\|_2 \lesssim \sqrt{p \log n}$ ,  $\|\mathbf{X}\|_2 \lesssim \sqrt{n} + \sqrt{p}$ ,  $\|\mathbf{W}\|_2 \lesssim \sigma(\sqrt{n} + \sqrt{m})$  hold with high probability, and in  $\textcircled{2}$  we use  $p \asymp n$ . Comparing with our results in Lemma 10, this bound experience inflations when  $m \ll n$  and will lift the SNR requirement to  $\log(\text{SNR}) \gtrsim \log n$ , which hides the role of  $\rho(\mathbf{B}^{\natural})$  compared with our current result in Theorem 2. To handle such problem, we adopt the leave-one-out trick as in El Karoui (2013; 2018); Chen et al. (2019); Sur et al. (2019) and refer to Lemma 10 for the technical details.

Having illustrated our proof strategies, we leave the detailed calculation to Section D.3.

## D.3. Proof of Theorem 2

**Proof 6** We restate the definition of event  $\mathcal{E}$  as

$$\mathcal{E} \triangleq \left\{ \|\mathbf{Y}_{i,:} - \mathbf{X}_{\pi^{\natural}(i),:} \mathbf{B}^*\|_2^2 \geq \|\mathbf{Y}_{i,:} - \mathbf{X}_{j,:} \mathbf{B}^*\|_2^2, \exists i, j \right\}.$$

**Step I:** First we verify that

$$\widehat{\Pi} = \operatorname{argmin}_{\Pi} \|\mathbf{Y} - \Pi \mathbf{X} \mathbf{B}^*\|_{\text{F}}$$

returns the same permutation matrix  $\widehat{\Pi}$  as that by Eq. (3). Hence, correct recovery of the ground truth permutation matrix  $\Pi^{\natural}$  suggests that

$$\|\mathbf{Y} - \Pi^{\natural} \mathbf{X} \mathbf{B}^*\|_{\text{F}} < \|\mathbf{Y} - \Pi \mathbf{X} \mathbf{B}^*\|_{\text{F}}, \forall \Pi \neq \Pi^{\natural}.$$

Then we finish the proof by showing that  $\bar{\mathcal{E}} \subseteq \{\widehat{\Pi} = \Pi^\natural\}$ . Assuming the claim is not true, which means we have matrix  $\Pi$  such that

$$\left\| \mathbf{Y} - \Pi^\natural \mathbf{X} \mathbf{B}^* \right\|_{\mathbb{F}}^2 \geq \left\| \mathbf{Y} - \Pi \mathbf{X} \mathbf{B}^* \right\|_{\mathbb{F}}^2,$$

conditional on event  $\bar{\mathcal{E}}$ . Meanwhile we have

$$\left\| \mathbf{Y} - \Pi^\natural \mathbf{X} \mathbf{B}^* \right\|_{\mathbb{F}}^2 = \sum_{i=1}^n \left\| \mathbf{Y}_{i,:} - \mathbf{X}_{\pi^\natural(i),:} \mathbf{B}^* \right\|_2^2 \stackrel{\textcircled{1}}{<} \sum_{i=1}^n \left\| \mathbf{Y}_{i,:} - \mathbf{X}_{\pi(i),:} \mathbf{B}^* \right\|_2^2 = \left\| \mathbf{Y} - \Pi \mathbf{X} \mathbf{B}^* \right\|_{\mathbb{F}}^2,$$

which leads to contradiction, where in  $\textcircled{1}$  we use the definition of  $\bar{\mathcal{E}}$ .

**Step II:** We verify that  $\left\| \mathbf{Y}_{i,:} - \mathbf{X}_{\pi^\natural(i),:} \mathbf{B}^* \right\|_2^2 \geq \left\| \mathbf{Y}_{i,:} - \mathbf{X}_{j,:} \mathbf{B}^* \right\|_2^2$  is equivalent to

$$\begin{aligned} 2 \langle \mathbf{W}_{i,:}, (\mathbf{X}_{j,:} - \mathbf{X}_{\pi^\natural(i),:}) \mathbf{B}^* \rangle &\geq \left\| (\mathbf{X}_{\pi^\natural(i),:} - \mathbf{X}_{j,:}) \mathbf{B}^\natural \right\|_2^2 + \left\| \mathbf{X}_{j,:} (\mathbf{B}^\natural - \mathbf{B}^*) \right\|_2^2 \\ &+ 2 \langle (\mathbf{X}_{\pi^\natural(i),:} - \mathbf{X}_{j,:}) \mathbf{B}^\natural, \mathbf{X}_{j,:} (\mathbf{B}^\natural - \mathbf{B}^*) \rangle - \left\| \mathbf{X}_{\pi^\natural(i),:} (\mathbf{B}^\natural - \mathbf{B}^*) \right\|_2^2, \end{aligned}$$

which suggests that  $\mathbb{P}(\mathcal{E}) \leq \mathbb{P}(\mathcal{E}_8) + \mathbb{P}(\mathcal{E}_9)$  and completes the proof with Lemma 5 and Lemma 6.

**Lemma 5** We have  $\mathbb{P}(\mathcal{E}_8) \leq c_0 e^{-(\log n)^4 \wedge (\log n)^2 \rho(\mathbf{B}^\natural)} + c_1 n^{-1} + c_2 n e^{-c_3 n} + c_4 n e^{-c_0 m} + 2e^{-p} + 6p^{-2}$ .

**Proof 7** For the conciseness of notation, we define  $\Delta_1$  and  $\Delta_2$  as

$$\begin{aligned} \Delta_1 &= 4c_0 \frac{p(\log n)^{3/2}(\log p)}{\sqrt{n}} \left\| \mathbf{B}^\natural \right\|_{\mathbb{F}} + 4c_1 \sqrt{m}(\log n) \sigma \left( 1 + \frac{p}{n} \right); \\ \Delta_2 &= c_2(\log n) \left\| \mathbf{B}^\natural \right\|_{\mathbb{F}}. \end{aligned}$$

Then we can bound  $\mathbb{P}(\mathcal{E}_8)$  as

$$\begin{aligned} \mathbb{P}(\mathcal{E}_8) &\stackrel{\textcircled{1}}{\leq} \mathbb{P} \left( \left\| (\mathbf{X}_{j,:} - \mathbf{X}_{\pi^\natural(i),:}) \mathbf{B}^* \right\|_2 \geq \Delta_1 + \Delta_2, \exists i, j \right) + \exp \left( -\frac{\Delta^2}{2\sigma^2 (\Delta_1 + \Delta_2)^2} \right) \\ &\stackrel{\textcircled{2}}{\leq} \underbrace{\mathbb{P} \left( \left\| (\mathbf{X}_{j,:} - \mathbf{X}_{\pi^\natural(i),:}) (\mathbf{B}^* - \mathbf{B}^\natural) \right\|_2 \geq \Delta_1, \exists i, j \right)}_{\zeta_1} + \underbrace{\mathbb{P} \left( \left\| (\mathbf{X}_{j,:} - \mathbf{X}_{\pi^\natural(i),:}) \mathbf{B}^\natural \right\|_2 \geq \Delta_2, \exists i, j \right)}_{\zeta_2} + n^{-8}, \quad (15) \end{aligned}$$

where in  $\textcircled{1}$  we use the independence between  $\mathbf{W}$  and  $\mathbf{X}$  and condition on  $\mathbf{X}$ , in  $\textcircled{2}$  we use the relation  $\Delta = 4\sqrt{2}\sigma (\Delta_1 + \Delta_2)$ . Then we will prove that  $\zeta_1 \leq \mathbb{P}(\bar{\mathcal{E}}_7)$  and  $\zeta_2 \asymp e^{-(\log n)^4 \wedge (\log n)^2 \rho(\mathbf{B}^\natural)}$ .

**Phase I: bounding  $\zeta_1$**  Conditional on  $\mathcal{E}_7$ , we have

$$\begin{aligned} \left\| (\mathbf{X}_{j,:} - \mathbf{X}_{\pi^\natural(i),:}) (\mathbf{B}^* - \mathbf{B}^\natural) \right\|_2 &\leq \left\| \mathbf{X}_{j,:} (\mathbf{B}^* - \mathbf{B}^\natural) \right\|_2 + \left\| \mathbf{X}_{\pi^\natural(i),:} (\mathbf{B}^* - \mathbf{B}^\natural) \right\|_2 \\ &\stackrel{\textcircled{3}}{\leq} 2c_0 \frac{p(\log n)^{3/2}(\log p)}{\sqrt{n}} \left\| \mathbf{B}^\natural \right\|_{\mathbb{F}} + 2c_1 \sqrt{m}(\log n) \sigma \left( 1 + \frac{p}{n} \right) < \frac{\Delta_1}{2}, \end{aligned}$$

and obtain  $\zeta_1 = 0$ , where  $\textcircled{3}$  is due to the definition of  $\mathcal{E}_7$ . Then we conclude that  $\zeta_1 \leq \mathbb{P}(\bar{\mathcal{E}}_7)$ .

**Phase II: bounding  $\zeta_2$**  For  $\zeta_2$ , we upper-bound it as

$$\begin{aligned} \zeta_2 &\stackrel{\textcircled{4}}{\leq} \sum_{\pi^\natural(i), j} \mathbb{P} \left( Z \geq c_2(\log n)^2 \left\| \mathbf{B}^\natural \right\|_{\mathbb{F}}^2 \right) \stackrel{\textcircled{5}}{\leq} n^2 \mathbb{P} \left( |Z - \mathbb{E}Z| \geq c_3(\log n)^2 \left\| \mathbf{B}^\natural \right\|_{\mathbb{F}}^2 \right) \\ &\stackrel{\textcircled{6}}{\leq} n^2 \exp \left( -\left( \frac{(\log n)^4 \left\| \mathbf{B}^\natural \right\|_{\mathbb{F}}^4}{\left\| \mathbf{B}^\natural \mathbf{B}^{\natural\top} \right\|_{\mathbb{F}}^2} \wedge \frac{(\log n)^2 \left\| \mathbf{B}^\natural \right\|_{\mathbb{F}}^2}{\left\| \mathbf{B}^\natural \mathbf{B}^{\natural\top} \right\|_{\text{OP}}} \right) \right) = n^2 e^{-(\log n)^4 \wedge (\log n)^2 \rho(\mathbf{B}^\natural)} \\ &\asymp e^{-(\log n)^4 \wedge (\log n)^2 \rho(\mathbf{B}^\natural)}, \quad (16) \end{aligned}$$

where in ④ we define  $Z \triangleq \left\| (\mathbf{X}_{j,:} - \mathbf{X}_{\pi^{\natural}(i),:}) \mathbf{B}^{\natural} \right\|_2^2$ , in ⑤ we have  $\mathbb{E}Z = 4 \left\| \mathbf{B}^{\natural} \right\|_{\text{F}}^2$  and use  $c_2(\log n)^2 \left\| \mathbf{B}^{\natural} \right\|_{\text{F}}^2 \geq (4 + c_3(\log n)^2) \left\| \mathbf{B}^{\natural} \right\|_{\text{F}}^2$  when  $n$  is sufficiently large, and in ⑥ we use the Hanson-Wright inequality (Theorem 6.2.1 in [Vershynin \(2018\)](#)). Combining Eq. (15), Eq. (16) and Lemma 8 together, we complete the proof.

**Lemma 6** Consider the same setting of Theorem 2. Provided the SNR satisfies

$$\log(\text{SNR}) \gtrsim \frac{6 \log n}{\rho(\mathbf{B}^{\natural})} + \log \log n,$$

we have  $\mathbb{P}(\mathcal{E}_9) \leq 2e^{-p} + ne^{-c_1 m} + c_2 p^{-2} + c_3 ne^{-c_4 n}$ , when  $n$  is sufficiently large, where  $c_i > 0$ ,  $0 \leq i \leq 4$  are some positive constants.

**Proof 8** We upper bound  $\mathbb{P}(\mathcal{E}_9)$  as

$$\begin{aligned} \mathbb{P}(\mathcal{E}_9) &\leq \mathbb{P} \left( \left\| (\mathbf{X}_{\pi^{\natural}(i),:} - \mathbf{X}_{j,:}) \mathbf{B}^{\natural} \right\|_2^2 - 2 \left\| (\mathbf{X}_{\pi^{\natural}(i),:} - \mathbf{X}_{j,:}) \mathbf{B}^{\natural} \right\|_2 \left\| \mathbf{X}_{j,:} (\mathbf{B}^{\natural} - \mathbf{B}^*) \right\|_2 - \left\| \mathbf{X}_{\pi^{\natural}(i),:} (\mathbf{B}^{\natural} - \mathbf{B}^*) \right\|_2^2 \leq \Delta, \exists i, j \right) \\ &\leq \underbrace{\mathbb{P} \left( \left\| (\mathbf{X}_{\pi^{\natural}(i),:} - \mathbf{X}_{j,:}) \mathbf{B}^{\natural} \right\|_2 \leq \delta, \exists i, j \right)}_{\triangleq \zeta_1} + \underbrace{\mathbb{P} \left( \frac{\left\| \mathbf{X}_{\pi^{\natural}(i),:} (\mathbf{B}^{\natural} - \mathbf{B}^*) \right\|_2^2}{\delta^2} + \frac{2 \left\| \mathbf{X}_{\pi^{\natural}(i),:} (\mathbf{B}^{\natural} - \mathbf{B}^*) \right\|_2}{\delta} + \frac{\Delta}{\delta^2} \geq 1, \exists i, j \right)}_{\triangleq \zeta_2}. \end{aligned}$$

Setting  $\delta$  as  $\left\| \mathbf{B}^{\natural} \right\|_{\text{F}} n^{-\frac{3}{c\rho(\mathbf{B}^{\natural})}}$ , we would like to show  $\zeta_1 \lesssim n^{-1}$  and  $\zeta_2 \leq \mathbb{P}(\bar{\mathcal{E}}_7)$  under the assumptions in Lemma 6.

**Phase I: bounding  $\zeta_1$**  We set  $\delta$  as  $\left\| \mathbf{B}^{\natural} \right\|_{\text{F}} n^{-\frac{3}{c\rho(\mathbf{B}^{\natural})}}$ , and can upper bound  $\zeta_1$  as

$$\zeta_1 \leq \sum_{i=1}^n \sum_{j \neq \pi^{\natural}(i)} \mathbb{P} \left( \left\| (\mathbf{X}_{\pi^{\natural}(i),:} - \mathbf{X}_{j,:}) \mathbf{B}^{\natural} \right\|_2 \leq \delta \right) \stackrel{\textcircled{1}}{\leq} \sum_{i=1}^n \sum_{j \neq \pi^{\natural}(i)} n^{-3} \lesssim n^{-1}, \quad (17)$$

where ① comes from the small ball probability as in Lemma 2.6 in [Latala et al. \(2007\)](#), which is also stated as Lemma 12.

**Phase II: bounding  $\zeta_2$**  Then we prove that  $\zeta_2$  can be arbitrarily small under the SNR requirement in Eq. (7). Conditional on event  $\mathcal{E}_7$ , we have

$$\begin{aligned} \frac{\left\| \mathbf{X}_{\pi^{\natural}(i),:} (\mathbf{B}^{\natural} - \mathbf{B}^*) \right\|_2^2}{\delta^2} &\leq \frac{2c_0^2 p^2 (\log n)^3 (\log p)^2 \left\| \mathbf{B}^{\natural} \right\|_{\text{F}}^2 + 2c_1^2 m (\log n)^2 \sigma^2 (1 + p/n)^2}{\left\| \mathbf{B}^{\natural} \right\|_{\text{F}}^2 n^{-\frac{6}{c\rho(\mathbf{B}^{\natural})}}} \\ &\stackrel{\textcircled{2}}{\leq} \underbrace{\frac{2c_0^2 p^2 (\log n)^3 (\log p)^2}{n^{1-6/(c\rho(\mathbf{B}^{\natural}))}}}_{\eta_1} + \underbrace{8c_1^2 \frac{(\log n)^2 n^{\frac{6}{c\rho(\mathbf{B}^{\natural})}}}{\text{SNR}}}_{\eta_2}, \end{aligned} \quad (18)$$

in ② we use the fact  $p \leq n$ . Since we have  $n \geq p^4 (\log n)^6 (\log p)^4$  and  $\rho(\mathbf{B}^{\natural}) \geq 18/c$ , we conclude  $\eta_1 \rightarrow 0$  as  $n$  goes to infinity. Meanwhile, because of the assumptions in Eq. (7), we have  $\eta_2$  to be a small positive constants.

Additionally, we can expand  $\Delta/\delta^2$  as

$$\begin{aligned} \frac{\Delta}{\delta^2} &\lesssim \frac{n^{\frac{6}{c\rho(\mathbf{B}^{\natural})}} \sigma}{\left\| \mathbf{B}^{\natural} \right\|_{\text{F}}^2} \left( c_0 \frac{p (\log n)^{3/2} (\log p)}{\sqrt{n}} \left\| \mathbf{B}^{\natural} \right\|_{\text{F}} + c_1 \sqrt{m} (\log n) \sigma \left( 1 + \frac{p}{n} \right) + c_2 (\log n) \left\| \mathbf{B}^{\natural} \right\|_{\text{F}} \right) \\ &\lesssim c_0 \frac{p (\log n)^{3/2} (\log p)}{\sqrt{mn}} \times \frac{n^{\frac{6}{c\rho(\mathbf{B}^{\natural})}}}{\sqrt{\text{SNR}}} + c_1 \frac{\log n}{\sqrt{m}} \times \frac{n^{\frac{6}{c\rho(\mathbf{B}^{\natural})}}}{\sqrt{\text{SNR}}} + c_2 \frac{\log n}{\sqrt{m}} \times \frac{n^{\frac{6}{c\rho(\mathbf{B}^{\natural})}}}{\text{SNR}}. \end{aligned} \quad (19)$$

Following similar procedures as above, we can prove  $\Delta/\delta^2$  to be a small positive constant given Eq. (7). Combing Eq. (18) and Eq. (19) together, we conclude

$$\eta_1 + \eta_2 + 2\sqrt{\eta_1 + \eta_2} + \frac{\Delta}{\delta^2} < 1,$$

which suggests that  $\zeta_2$  equals zero conditional on events  $\mathcal{E}_7$ . Therefore, we obtain

$$\zeta_2 \leq \mathbb{P}(\bar{\mathcal{E}}_7) \stackrel{\textcircled{3}}{\leq} 2e^{-p} + 6p^{-2} + ne^{-c_0 m} + c_0 n^{-1} + c_1 ne^{-c_2 n} \stackrel{\textcircled{4}}{\lesssim} 2e^{-p} + ne^{-c_0 m} + c_0 p^{-2} + c_1 ne^{-c_2 n}$$

and completes the proof together with Eq. (17), where ③ is due to Lemma 8, and ④ is because of  $n \gtrsim p^2$ .



#### D.4. Supporting Lemmas for Theorem 2

**Lemma 7** For arbitrary row  $\mathbf{X}_{i,:}$ , we have

$$\|\mathbf{X}_{i,:}\|_2 \leq 2\sqrt{p \log n},$$

with probability exceeding  $1 - n^{-p}$ .

**Proof 9** Notice that  $\|\mathbf{X}_{i,:}\|_2^2$  is a  $\chi^2$ -RV with freedom  $p$ , we have

$$\mathbb{P}\left(\|\mathbf{X}_{i,:}\|_2^2 \geq 4p \log n\right) \leq \exp\left(\frac{p}{2}(\log(4p \log n) - 4 \log n + 1)\right) \stackrel{\textcircled{1}}{\leq} \exp(-p \log n) = n^{-p},$$

where in  $\textcircled{1}$  we use  $2 \log n \geq \log(4 \log n) + 1$ , when  $n \geq 4$ .

**Lemma 8** We have  $\mathbb{P}(\mathcal{E}_7) \geq 1 - 2e^{-p} - 6p^{-2} - ne^{-c_0 m} - c_0 n^{-1} - c_1 ne^{-c_2 n}$ .

**Proof 10** Invoking Lemma 10, we have

$$\begin{aligned} & \mathbb{P}\left(\|\mathbf{X}_{i,:}\mathbf{X}^\top \mathbf{W}\|_2 \leq c_0 \sqrt{m}(\log n)\sigma(n+p), \forall i\right) \\ &= 1 - \mathbb{P}\left(\|\mathbf{X}_{i,:}\mathbf{X}^\top \mathbf{W}\|_2 > c_0 \sqrt{m}(\log n)\sigma(n+p), \exists i\right) \\ &\geq 1 - \sum_i \mathbb{P}\left(\|\mathbf{X}_{i,:}\mathbf{X}^\top \mathbf{W}\|_2 > c_0 \sqrt{m}(\log n)\sigma(n+p)\right) \\ &\geq 1 - n^{1-p} - ne^{-c_0 m} - n^{-1} - c_1 ne^{-c_2 n}. \end{aligned} \tag{20}$$

Then we conclude

$$\begin{aligned} & \|\mathbf{X}_{i,:}(\mathbf{B}^* - \mathbf{B}^\natural)\|_2 \leq \|\mathbf{X}_{i,:}(\tilde{\mathbf{B}} - \mathbf{B}^\natural)\|_2 + \frac{1}{n-h}\|\mathbf{X}_{i,:}\mathbf{X}^\top \mathbf{W}\|_2 \\ &\leq \|\mathbf{X}_{i,:}\|_2 \|\tilde{\mathbf{B}} - \mathbf{B}^\natural\|_F + \frac{1}{n-h}\|\mathbf{X}_{i,:}\mathbf{X}^\top \mathbf{W}\|_2 \\ &\stackrel{\textcircled{1}}{\leq} c_0 \frac{p(\log n)^{3/2}(\log p)}{\sqrt{n}} \|\mathbf{B}^\natural\|_F + \frac{c_1 \sqrt{m}(\log n)\sigma(n+p)}{n-h} \\ &\stackrel{\textcircled{2}}{\leq} c_0 \frac{p(\log n)^{3/2}(\log p)}{\sqrt{n}} \|\mathbf{B}^\natural\|_F + \frac{4}{3}c_1 \sqrt{m}(\log n)\sigma\left(1 + \frac{p}{n}\right), \end{aligned}$$

where in  $\textcircled{1}$  we condition on Lemma 9 and Eq. (20), and in  $\textcircled{2}$  we use the fact  $h \leq n/4$ .

**Lemma 9** Provided that  $n \gtrsim p^2$ ,  $h \leq n/4$ , we have

$$\|\tilde{\mathbf{B}} - \mathbf{B}^\natural\|_F \leq \sqrt{\frac{p}{n}} \|\mathbf{B}^\natural\|_F \left(4\sqrt{6} + (\log n)(\log p)\right),$$

with probability at least  $1 - 2e^{-p} - 6p^{-2}$  when  $n, p$  are sufficiently large.

**Proof 11** We assume that the first  $h$  rows of  $\mathbf{X}$  are permuted w.l.o.g. First, we expand  $\mathbf{X}^\top \mathbf{\Pi}^\natural \mathbf{X}$  as

$$\mathbf{X}^\top \mathbf{\Pi}^\natural \mathbf{X} = \sum_{i=1}^h \mathbf{X}_{\pi(i),:}^\top \mathbf{X}_{i,:} + \sum_{i=h+1}^n \mathbf{X}_{i,:}^\top \mathbf{X}_{i,:},$$

and obtain

$$\begin{aligned}
 & \mathbb{P} \left( \left\| \mathbf{B}^\natural - \tilde{\mathbf{B}} \right\|_2 \geq \sqrt{\frac{p}{n}} \left\| \mathbf{B}^\natural \right\|_F \left( 4\sqrt{6} + (\log n)(\log p) \right) \right) \\
 & \leq \mathbb{P} \left( \frac{1}{n-h} \left\| \sum_{i=1}^h \mathbf{X}_{\pi(i),:}^\top \mathbf{X}_{i,:} \mathbf{B}^\natural \right\|_F + \frac{1}{n-h} \left\| \sum_{i=h+1}^n (\mathbf{X}_{i,:}^\top \mathbf{X}_{i,:} - \mathbf{I}) \mathbf{B}^\natural \right\|_F \geq \sqrt{\frac{p}{n}} \left\| \mathbf{B}^\natural \right\|_F \left( 4\sqrt{6} + (\log n)(\log p) \right) \right) \\
 & \stackrel{\textcircled{1}}{\leq} \underbrace{\mathbb{P} \left( \frac{1}{n-h} \left\| \sum_{i=1}^h \mathbf{X}_{\pi(i),:}^\top \mathbf{X}_{i,:} \mathbf{B}^\natural \right\|_F \geq \frac{(\log n)(\log p)\sqrt{p}}{\sqrt{n}} \left\| \mathbf{B}^\natural \right\|_F \right)}_{\zeta_1} \\
 & + \underbrace{\mathbb{P} \left( \frac{1}{n-h} \left\| \sum_{i=h+1}^n (\mathbf{X}_{i,:}^\top \mathbf{X}_{i,:} - \mathbf{I}) \mathbf{B}^\natural \right\|_F \geq 4\sqrt{\frac{6p}{n}} \left\| \mathbf{B}^\natural \right\|_F \right)}_{\zeta_2},
 \end{aligned}$$

where  $\textcircled{1}$  is because of the union bound. Then we separately bound  $\zeta_1$  and  $\zeta_2$ .

**Phase I: Bounding  $\zeta_1$**  According to Lemma 8 in Pananjady et al. (2017a) (restated as Lemma 13), we can decompose the set  $\{j : \pi(j) \neq j\}$  into three disjoint sets  $\mathcal{I}_i$ ,  $1 \leq i \leq 3$ , such that  $j$  and  $\pi(j)$  does not lie in the same set. And the cardinality of set  $\mathcal{I}_i$  is  $h_i$  satisfies  $\lfloor h/5 \rfloor \leq h_i \leq h/3$ . Adopting the union bound, we can upper-bound  $\zeta_1$  as

$$\begin{aligned}
 \zeta_1 & \leq \sum_{i=1}^3 \mathbb{P} \left( \frac{1}{n-h} \left\| \sum_{j \in \mathcal{I}_i} \mathbf{X}_{\pi(j),:}^\top \mathbf{X}_{j,:} \mathbf{B}^\natural \right\|_F \geq \frac{(\log n)(\log p)\sqrt{p}}{3\sqrt{n}} \left\| \mathbf{B}^\natural \right\|_F \right) \\
 & \leq \sum_{i=1}^3 \mathbb{P} \left( \frac{1}{n-h} \left\| \sum_{j \in \mathcal{I}_i} \mathbf{X}_{\pi(j),:}^\top \mathbf{X}_{j,:} \right\|_F \geq \frac{(\log n)(\log p)\sqrt{p}}{3\sqrt{n}} \right).
 \end{aligned}$$

Defining  $\mathbf{Z}_i$  as  $\mathbf{Z}_i = \sum_{j \in \mathcal{I}_i} \mathbf{X}_{\pi(j),:}^\top \mathbf{X}_{j,:}$ , we would bound the above probability by invoking the matrix Bernstein inequality (cf. Thm 7.3.1 in Tropp (2015)). First, we have

$$\mathbb{E} \left( \mathbf{X}_{\pi(j),:}^\top \mathbf{X}_{j,:} \right) = \left( \mathbb{E} \mathbf{X}_{\pi(j),:} \right)^\top \left( \mathbb{E} \mathbf{X}_{j,:} \right) = 0,$$

due to the independence between  $\mathbf{X}_{\pi(j),:}$  and  $\mathbf{X}_{j,:}$ . Then we upper bound  $\left\| \mathbf{X}_{\pi(j),:}^\top \mathbf{X}_{j,:} \right\|_2$  as

$$\left\| \mathbf{X}_{\pi(j),:}^\top \mathbf{X}_{j,:} \right\|_2 \stackrel{\textcircled{2}}{\leq} \left\| \mathbf{X}_{\pi(j),:}^\top \mathbf{X}_{j,:} \right\|_F \stackrel{\textcircled{3}}{\leq} \left\| \mathbf{X}_{\pi(j),:} \right\|_2 \left\| \mathbf{X}_{j,:} \right\|_2 \stackrel{\textcircled{4}}{\leq} 4p \log n,$$

where  $\textcircled{2}$  is because  $\mathbf{X}_{\pi(j),:}^\top \mathbf{X}_{j,:}$  is rank-1,  $\textcircled{3}$  is due to the fact  $\left\| \mathbf{u}\mathbf{v}^\top \right\|_F^2 = \text{Tr}(\mathbf{u}\mathbf{v}^\top \mathbf{v}\mathbf{u}^\top) = \|\mathbf{u}\|_2^2 \|\mathbf{v}\|_2^2$  for arbitrary vector  $\mathbf{u}, \mathbf{v} \in \mathbb{R}^p$ , and  $\textcircled{4}$  is because of Lemma 7.

In the end, we compute  $\mathbb{E}(\mathbf{Z}_i \mathbf{Z}_i^\top)$  and  $\mathbb{E}(\mathbf{Z}_i^\top \mathbf{Z}_i)$  as

$$\begin{aligned}
 \mathbb{E}(\mathbf{Z}_i^\top \mathbf{Z}_i) & = \mathbb{E} \left( \sum_{j_1, j_2 \in \mathcal{I}_i} \mathbf{X}_{\pi(j_1),:}^\top \mathbf{X}_{j_1,:} \mathbf{X}_{j_2,:}^\top \mathbf{X}_{\pi(j_2),:} \right) \stackrel{\textcircled{5}}{=} \mathbb{E} \left( \sum_{j \in \mathcal{I}_i} \mathbf{X}_{\pi(j),:}^\top \mathbf{X}_{j,:} \mathbf{X}_{j,:}^\top \mathbf{X}_{\pi(j),:} \right) \\
 & \stackrel{\textcircled{6}}{=} \mathbb{E} \left( \sum_{j \in \mathcal{I}_i} \mathbf{X}_{\pi(j),:}^\top \mathbb{E}(\mathbf{X}_{j,:} \mathbf{X}_{j,:}^\top) \mathbf{X}_{\pi(j),:} \right) = p \left( \sum_{j \in \mathcal{I}_i} \mathbb{E} \mathbf{X}_{\pi(j),:}^\top \mathbf{X}_{\pi(j),:} \right) = ph_i \mathbf{I}_{p \times p} = \mathbb{E}(\mathbf{Z}\mathbf{Z}^\top),
 \end{aligned}$$

where  $\textcircled{5}$  and  $\textcircled{6}$  is because of the fact such that  $j$  and  $\pi(j)$  are not within the set  $\mathcal{I}_i$  simultaneously. To sum up, we invoke the matrix Bernstein inequality (cf. Thm 7.3.1 in Tropp (2015)) and have

$$\frac{1}{n-h} \left\| \sum_{j \in \mathcal{I}} \mathbf{X}_{\pi(j),:}^\top \mathbf{X}_{j,:} \right\|_2 \leq \frac{1}{3} \left( \frac{4p(\log n)(\log p)}{n-h} + \frac{p\sqrt{16(\log n)^2(\log p)^2 + 6h_i \log p/p}}{n-h} \right)$$

holds with probability  $1 - 2p^{-2}$ .

Exploiting the fact such that  $h \leq n/4$ ,  $h_i \leq h/3$ , and  $p \lesssim \sqrt{n}$ , we obtain

$$\frac{p\sqrt{16(\log n)^2(\log p)^2 + 6h_i \log p/p}}{n-h} \leq \frac{4p}{3n} \sqrt{16(\log n)^2(\log p)^2 + \frac{n}{2p}(\log n)(\log p)} \stackrel{\textcircled{7}}{\leq} \frac{4\sqrt{p}}{3\sqrt{n}} \times (\log n)(\log p),$$

in  $\textcircled{7}$  we  $n \gtrsim p^2 \geq 32p$  and hence

$$\frac{1}{n-h} \left\| \sum_{j \in \mathcal{I}} \mathbf{X}_{\pi(j),:}^\top \mathbf{X}_{j,:} \right\|_2 \leq (\log n)(\log p) \left( \frac{16p}{9n} + \frac{4\sqrt{p}}{9\sqrt{n}} \right) \stackrel{\textcircled{8}}{\leq} \sqrt{\frac{p}{n}} (\log n)(\log p),$$

holds with probability exceeding  $1 - 6p^{-2}$ , where in  $\textcircled{8}$  we use  $n \geq 256p/25$ .

**Phase II: Bounding  $\zeta_2$**  We upper bound  $\zeta_2$  as

$$\begin{aligned} \zeta_2 &\leq \mathbb{P} \left( \frac{1}{n-h} \left\| \sum_{i=h+1}^n (\mathbf{X}_{i,:}^\top \mathbf{X}_{i,:} - \mathbf{I}) \mathbf{B}^\dagger \right\|_{\text{F}} \geq 4\sqrt{\frac{6p}{n}} \|\mathbf{B}^\dagger\|_{\text{F}} \right) \\ &\leq \mathbb{P} \left( \frac{1}{n-h} \left\| \sum_{i=h+1}^n (\mathbf{X}_{i,:}^\top \mathbf{X}_{i,:} - \mathbf{I}) \right\|_{\text{OP}} \|\mathbf{B}^\dagger\|_{\text{F}} \geq 4\sqrt{\frac{6p}{n}} \|\mathbf{B}^\dagger\|_{\text{F}} \right) \stackrel{\textcircled{9}}{\leq} 2e^{-p}. \end{aligned}$$

where  $\textcircled{9}$  is because of  $(n-h)^{-1} \left\| \sum_{i=h+1}^n (\mathbf{X}_{i,:}^\top \mathbf{X}_{i,:} - \mathbf{I}) \right\|_2 \leq 6\sqrt{2p/(n-h)}$  with probability  $2e^{-p}$  in Example 6.1 in [Wainwright \(2019\)](#) (also listed as Lemma 14) and  $h \leq n/4$ .

The proof is completed via combing the results in Phase I and Phase II.

**Lemma 10** For an arbitrary index  $i$ , we have

$$\mathbb{P} \left( \|\mathbf{X}_{i,:} \mathbf{X}^\top \mathbf{W}\|_2 \geq c_0 \sqrt{m} (\log n) \sigma (n+p) \right) \leq n^{-p} + e^{-c_0 m} + n^{-2} + c_1 e^{-c_2 n}.$$

**Proof 12** For the conciseness of notation, we define  $\delta$  as  $c_0 \sqrt{m} (\log n) \sigma (n+p)$ . In addition, we assume that  $i = 1$  w.l.o.g and prove this lemma with the leave-one-out trick, which is previously used in [El Karoui \(2013\)](#); [El Karoui et al. \(2013\)](#); [El Karoui \(2018\)](#); [Chen et al. \(2019\)](#); [Sur et al. \(2019\)](#). First we define a perturbed matrix  $\tilde{\mathbf{X}}$  such that  $\tilde{\mathbf{X}}_{j,:} = \mathbf{X}_{j,:}$ ,  $2 \leq j \leq n$ , while  $\tilde{\mathbf{X}}_{1,:} \in \mathbb{R}^{1 \times p}$  is a independent identically distributed Gaussian vector as  $\mathbf{X}_{1,:}$ , namely,  $\mathcal{N}(\mathbf{0}, \mathbf{I})$ .

Then we can upper-bound the probability as

$$\begin{aligned} \mathbb{P} \left( \|\mathbf{X}_{1,:} \mathbf{X}^\top \mathbf{W}\|_2 \geq \delta \right) &\leq \mathbb{P} \left( \left\| \mathbf{X}_{1,:} \tilde{\mathbf{X}}^\top \mathbf{W} \right\|_2 + \left\| \mathbf{X}_{1,:} (\mathbf{X} - \tilde{\mathbf{X}})^\top \mathbf{W} \right\|_2 \geq \delta \right) \\ &\leq \underbrace{\mathbb{P} \left( \left\| \mathbf{X}_{1,:} (\mathbf{X} - \tilde{\mathbf{X}})^\top \mathbf{W} \right\|_2 \geq 4p (\log n) \sqrt{m} \sigma \right)}_{\zeta_1} + \underbrace{\mathbb{P} \left( \left\| \mathbf{X}_{1,:} \tilde{\mathbf{X}}^\top \mathbf{W} \right\|_2 \geq \delta - 4p (\log n) \sqrt{m} \sigma \right)}_{\zeta_2}. \end{aligned}$$

**Phase I: bounding  $\zeta_1$**  To bound  $\zeta_1$ , easily we can verify the following relation

$$\left\| \mathbf{X}_{1,:} (\mathbf{X} - \tilde{\mathbf{X}})^\top \mathbf{W} \right\|_2 \leq \|\mathbf{X}_{1,:}\|_2 \left\| (\mathbf{X} - \tilde{\mathbf{X}})^\top \mathbf{W} \right\|_{\text{F}} \stackrel{\textcircled{1}}{=} \|\mathbf{X}_{1,:}\|_2 \|\mathbf{X}_{1,:} - \tilde{\mathbf{X}}_{1,:}\|_2 \|\mathbf{W}_{1,:}\|_2 \stackrel{\textcircled{2}}{\leq} 4p (\log n) \sqrt{m} \sigma.$$

with probability exceeding  $1 - n^{-p} - e^{-c_0 m}$ , where  $\textcircled{1}$  is because only the first row of  $\mathbf{X} - \tilde{\mathbf{X}}$  is nonzero, and  $\textcircled{2}$  conditions on  $\mathcal{E}_6$  and  $\|\mathbf{W}_{1,:}\|_2 \leq 2\sqrt{m} \sigma$  holds with probability at least  $1 - e^{-c_0 m}$ .

**Phase II: bounding  $\zeta_2$**  Since  $\delta - 4p (\log n) \sqrt{m} \sigma \gtrsim n (\log n) \sqrt{m} \sigma$ , we can upper-bound  $\zeta_2$  as

$$\zeta_2 \leq \mathbb{P} \left( \left\| \mathbf{X}_{1,:} \tilde{\mathbf{X}}^\top \mathbf{W} \right\|_2 \geq c_1 n (\log n) \sqrt{m} \sigma \right).$$

Due to the construction of  $\tilde{\mathbf{X}}$ , we have  $\mathbf{X}_{1,:}$  to be independent of  $\tilde{\mathbf{X}}$ . Hence, we condition on  $\tilde{\mathbf{X}}^\top \mathbf{W}$  and obtain

$$\begin{aligned} \zeta_2 &\leq \mathbb{P} \left( \left\| \mathbf{X}_{i,:} \tilde{\mathbf{X}}^\top \mathbf{W} \right\|_2 \geq c_1 n (\log n) \sqrt{m} \sigma, \left\| \tilde{\mathbf{X}}^\top \mathbf{W} \right\|_F < 8n \sqrt{m} \sigma \right) + \mathbb{P} \left( \left\| \tilde{\mathbf{X}}^\top \mathbf{W} \right\|_F \geq 8n \sqrt{m} \sigma \right) \\ &\leq \underbrace{\mathbb{E}_{\tilde{\mathbf{X}}^\top \mathbf{W}} \mathbb{1} \left( \left\| \mathbf{X}_{i,:} \tilde{\mathbf{X}}^\top \mathbf{W} \right\|_2 \geq c_2 (\log n) \left\| \tilde{\mathbf{X}}^\top \mathbf{W} \right\|_F \right)}_{\zeta_{2,1}} + \underbrace{\mathbb{P} \left( \left\| \tilde{\mathbf{X}}^\top \mathbf{W} \right\|_F \geq 8n \sqrt{m} \sigma \right)}_{\zeta_{2,2}}. \end{aligned}$$

For  $\zeta_{2,1}$ , we define  $Z = \left\| \mathbf{X}_{i,:} \tilde{\mathbf{X}}^\top \mathbf{W} \right\|_2^2$  and have

$$\begin{aligned} \zeta_{2,1} &\leq \mathbb{E}_{\tilde{\mathbf{X}}^\top \mathbf{W}} \mathbb{1} \left( |Z - \mathbb{E}Z| \geq c_3 (\log n)^2 \left\| \tilde{\mathbf{X}}^\top \mathbf{W} \right\|_F^2 \right) \\ &\stackrel{\textcircled{3}}{\leq} \mathbb{E}_{\tilde{\mathbf{X}}^\top \mathbf{W}} \exp \left( - \left( \frac{(\log n)^4 \left\| \tilde{\mathbf{X}}^\top \mathbf{W} \right\|_F^4}{\left\| \tilde{\mathbf{X}}^\top \mathbf{W} \mathbf{W}^\top \tilde{\mathbf{X}} \right\|_F^2} \wedge \frac{(\log n)^2 \left\| \tilde{\mathbf{X}}^\top \mathbf{W} \right\|_F^2}{\left\| \tilde{\mathbf{X}}^\top \mathbf{W} \mathbf{W}^\top \tilde{\mathbf{X}} \right\|_{\text{OP}}} \right) \right) \stackrel{\textcircled{4}}{\leq} n^{-2}, \end{aligned}$$

where  $\textcircled{3}$  is because of the Hanson-Wright inequality (Theorem 6.2.1 in [Vershynin \(2018\)](#)), and  $\textcircled{4}$  is due to the stable rank  $\rho(\tilde{\mathbf{X}}^\top \mathbf{W}) \geq 1$ . Meanwhile we upper-bound  $\zeta_{2,2}$  as

$$\begin{aligned} \mathbb{P} \left( \left\| \tilde{\mathbf{X}}^\top \mathbf{W} \right\|_2 \geq 8n \sqrt{m} \sigma \right) &\leq \mathbb{P} \left( \left\| \tilde{\mathbf{X}} \right\|_{\text{OP}} \left\| \mathbf{W} \right\|_F \geq 8n \sqrt{m} \sigma \right) \\ &\stackrel{\textcircled{5}}{\leq} \mathbb{P} \left( \left\| \tilde{\mathbf{X}} \right\|_{\text{OP}} \geq 2(\sqrt{n} + \sqrt{p}) \right) + \mathbb{P} \left( \left\| \mathbf{W} \right\|_F \geq \frac{8n \sqrt{m} \sigma}{2(\sqrt{n} + \sqrt{p})}, \left\| \tilde{\mathbf{X}} \right\|_{\text{OP}} \leq 2(\sqrt{n} + \sqrt{p}) \right) \\ &\stackrel{\textcircled{6}}{\leq} \mathbb{P} \left( \left\| \tilde{\mathbf{X}} \right\|_{\text{OP}} \geq 2(\sqrt{n} + \sqrt{p}) \right) + \mathbb{P} \left( \left\| \mathbf{W} \right\|_F \geq \sqrt{2nm} \sigma \right) \stackrel{\textcircled{7}}{\leq} e^{-c_0 n} + e^{-0.8nm}, \end{aligned}$$

where  $\textcircled{5}$  is because of the union bound, in  $\textcircled{6}$  we use  $p \leq n$ , and in  $\textcircled{7}$  we use  $\left\| \mathbf{X} \right\|_{\text{OP}} \geq 2(\sqrt{n} + \sqrt{p})$  with probability less than  $e^{-c_0 n}$  ([Chandrasekaran et al., 2012](#)) and the fact  $\left\| \mathbf{W} \right\|_F^2 / \sigma^2$  is a  $\chi^2$ -RV with  $nm$  freedom, and [Lemma 11](#).

## E. Useful Facts

This section lists some useful facts for the sake of self-containing.

**Lemma 11** For a  $\chi^2$ -RV  $Z$  with  $\ell$  freedom, we have

$$\begin{aligned} \mathbb{P}(Z \leq t) &\leq \exp \left( \frac{\ell}{2} \left( \log \frac{t}{\ell} - \frac{t}{\ell} + 1 \right) \right), \quad t < \ell; \\ \mathbb{P}(Z \geq t) &\leq \exp \left( \frac{\ell}{2} \left( \log \frac{t}{\ell} - \frac{t}{\ell} + 1 \right) \right), \quad t > \ell. \end{aligned}$$

**Lemma 12 (Small ball probability, Lemma 2.6 in [Latala et al. \(2007\)](#))** Given an arbitrary fixed vector  $\mathbf{y} \in \mathbb{R}^n$ , we have

$$\mathbb{P}(\|\mathbf{y} - \mathbf{A}\mathbf{g}\|_2 \leq \alpha \|\mathbf{A}\|_F) \leq \exp(\kappa \log(\alpha) \varrho(\mathbf{A})), \quad \forall \alpha \in (0, \alpha_0),$$

where  $\mathbf{g}$  is a Gaussian RV following  $\mathcal{N}(\mathbf{0}, \mathbf{I}_{n \times n})$ ,  $\mathbf{A} \in \mathbb{R}^{n \times n}$  is a non-zero matrix, and  $\alpha_0 \in (0, 1)$  and  $\kappa > 0$  are some universal constants.

**Lemma 13 (Lemma 8 in [Pananjady et al. \(2017a\)](#))** Consider an arbitrary permutation map  $\pi$  with Hamming distance  $k$  from the identity map, i.e.,  $d_H(\pi, \mathbf{I}) = k$ . We define the index set  $\{i : i \neq \pi(i)\}$  and can decompose it into 3 independent sets  $\mathcal{I}_j$  ( $1 \leq j \leq 3$ ), i.e.,  $i$  and  $\pi(i)$  are in different sets  $\mathcal{I}_j$  for arbitrary  $i \in \{i : i \neq \pi(i)\}$ , such that the cardinality of each set satisfies  $|\mathcal{I}_j| \geq \lfloor k/3 \rfloor \geq k/5$ .

**Lemma 14 (Example 6.1 in [Wainwright \(2019\)](#))** Let  $\mathbf{G} \in \mathbb{R}^{n_1 \times n_2}$  be generated with iid standard normal random variables, we have  $\|\mathbf{G}\|_{\text{OP}} \leq 4\sqrt{n_2/n_1}$ , hold with probability exceeding  $1 - 2e^{-n_2/2}$ .
